# Supplementary material
Source: HighWire-hosted journal article supplement (https://erj.ersjournals.com/content/55/5/1901879)
Supplement: inline-supplementary-material-1 [file inline-supplementary-material-1.pdf]

## SUPPLEMENT

Table S1. The interval in weeks between the baseline visit (when randomisation occurred) and subsequent follow up assessments in the seven randomised clinical trials whose data are included in the present analysis.

|                       | Follow up<br>visit 1 | Follow up<br>visit 2 | Follow up<br>visit 3 | Follow up<br>visit 4 | Follow up<br>visit 5 | Follow up<br>visit 6 | Follow up<br>visit 7 | Follow up<br>visit 8 |
|-----------------------|----------------------|----------------------|----------------------|----------------------|----------------------|----------------------|----------------------|----------------------|
| Fritsch[1]            | 6                    | 13                   | 18                   | 26                   |                      |                      |                      |                      |
| Peirsman[2]           | 13                   | 26                   | 39                   | 52                   |                      |                      |                      |                      |
| Petsky[3]             | 4                    | 9                    | 13                   | 17                   | 26                   | 32                   | 40                   | 52                   |
| Pijnenburg[4]         | 13                   | 26                   | 39                   | 52                   |                      |                      |                      |                      |
| Pike[5]               | 9                    | 17                   | 26                   | 34                   | 40                   | 52                   |                      |                      |
| Szefler[6]            | 6                    | 14                   | 22                   | 30                   | 38                   | 46                   |                      |                      |
| Voorend-van Bergen[7] | 17                   | 34                   | 52                   |                      |                      |                      |                      |                      |

Table S2. Characteristics of participants in the five subgroups where outcomes are compared between those in the standard treatment and F<sub>E</sub>NO guided treatment arms.

|                            | ICS dose        |                   | Atopy             |                | LTRA treatment    |                   | Obese            |                   | White             |                   |
|----------------------------|-----------------|-------------------|-------------------|----------------|-------------------|-------------------|------------------|-------------------|-------------------|-------------------|
|                            | ≤400 microg     | >400 microg       | Yes               | No             | Yes               | No                | Yes              | No                | Yes               | No                |
| Male gender                | 359/596 (60%)   | 284/516 (55%)     | 588/991 (59%)     | 36/86 (42%)‡   | 127/227 (56%)     | 515/880 (58%)     | 97/187 (52%)     | 535/898 (60%)     | 209/312 (66%)     | 311/587 (53%)‡    |
| Mean age (SD), y           | 12.1 (3.3)      | 13.2 (2.8) ‡      | 12.6 (3.1)        | 12.8 (3.3)     | 12.0 (3.1)        | 12.7 (3.1) ‡      | 13.9 (2.5)       | 12.2 (3.0) ‡      | 10.5 (2.8)        | 14.0 (2.4) ‡      |
| Any exacerbation           | 106/568 (19%)   | 190/479 (40%)‡    | 251/939 (27%)     | 27/78 (35%)    | 89/213 (42%)      | 207/829 (25%)‡    | 66/169 (39%)     | 226/857 (26%)‡    | 65/312 (21%)      | 183/524 (31%)‡    |
| Loss of control*           | 186/378 (49%)   | 158/302 (52%)     | 305/607 (50%)     | 23/50 (44%)    | 80/149 (54%)      | 264/531 (50%)     | 76/127 (60%)     | 261/538 (49%)‡    | 107/221 (48%)     | 185/375 (49%)     |
| LTRA treatment             | 77/595 (13%)    | 150/512 (30%)‡    | 204/986 (21%)     | 11/86 (13%)    | n/a               | n/a               | 40/187 (21%)     | 185/894 (21%)     | 106/312 (34%)     | 96/583 (16%)‡     |
| LABA treatment             | 185/595 (31%)   | 449/512 (88%)‡    | 553/986 (56%)     | 53/86 (62%)    | 168/227 (74%)     | 466/880 (53%)‡    | 130/187 (70%)    | 491/894 (55%)‡    | 161/312 (52%)     | 374/583 (64%)‡    |
| Baseline FENO median (IQR) | 21 (11.4, 40.2) | 23.6 (12, 47.8) ‡ | 23.6 (12.6, 46.1) | 10 (7.8, 16.2) | 22.5 (11.2, 42.3) | 21.8 (11.6, 43.0) | 16.8 (10, 31.6)  | 23 (12, 46.3) ‡   | 19.9 (10.2, 38.4) | 20.7 (11.2, 41.3) |
| Median (IQR) ICS dose†     | n/a             | n/a               | 400 (400,1000)    | 400 (400,1000) | 1000 (400,2000)   | 400 (400,1000) ‡  | 1000 (400, 2000) | 400 (400, 1000) ‡ | 400 (400, 800)    | 800 (400, 2000) ‡ |
| Proportion white           | 204/483 (42%)   | 108/416 (26%)‡    | 286/790 (36%)     | 9/75 (12%)‡    | 106/202 (53%)     | 206/693 (30%)‡    | 10/172 (6%)      | 301/707 (43%)‡    | n/a               | n/a               |
| Proportion obese           | 81/583(14%)     | 106/502 (21%)‡    | 165/967 (17%)     | 18/83 (22%)    | 40/225(18%)       | 147/856 (17%)     | n/a              | n/a               | 10/311 (3%)       | 162/568 (29%)‡    |
| Proportion atopic          | 527/879 (91%)   | 464/498 (93%)     | n/a               | n/a            | 204/215 (95%)     | 782/857 (91%)     | 165/183 (90%)    | 802/867 (92.5%)   | 286/295 (97%)     | 504/570 (88%)‡    |

\*After being controlled at baseline. †microg budesonide or equivalent. ‡ p<0.05.

Table S3. Proportion of individuals who were initially controlled who lost control in F<sub>E</sub>NO -guided and standard management arms of clinical trials with stratification for patient characteristics. ICS=inhaled corticosteroids, presented as ≤400 or >400 micrograms budesonide equivalent. Obesity was defined by International Obesity Task Force criteria.

| Baseline characteristic |             | % with loss of control during follow-up <sup>#</sup> in each treatment arm |                     | F <sub>E</sub> NO vs standard |              | p value for interaction* |
|-------------------------|-------------|----------------------------------------------------------------------------|---------------------|-------------------------------|--------------|--------------------------|
|                         |             | F <sub>E</sub> NO guided management                                        | Standard management | OR                            | 95% CI       |                          |
| LTRA treatment          | Yes         | 39/74 (53%)                                                                | 41/75 (55%)         | 0.94                          | (0.48, 1.87) | 0.453                    |
|                         | No          | 118/261 (45%)                                                              | 146/270 (54%)       | 0.70                          | (0.49, 1.00) |                          |
| ICS dose                | ≤400 microg | 88/191 (46%)                                                               | 98/187 (52%)        | 0.80                          | (0.52, 1.22) | 0.652                    |
|                         | >400 microg | 69/144 (48%)                                                               | 89/158 (56%)        | 0.69                          | (0.43, 1.99) |                          |
| Obese                   | Yes         | 40/66 (61%)                                                                | 36/61 (59%)         | 1.08                          | (0.53, 2.22) | 0.274                    |
|                         | No          | 116/264 (44%)                                                              | 145/274 (53%)       | 0.69                          | (0.48, 0.99) |                          |
| Atopic                  | Yes         | 133/291 (46%)                                                              | 172/316 (54%)       | 0.73                          | (0.52, 1.02) | 0.457                    |
|                         | No          | 14/30 (47%)                                                                | 8/20 (40%)          | 1.15                          | (0.36, 3.69) |                          |
| Ethnic group            | White       | 48/106 (45%)                                                               | 59/115 (51%)        | 0.76                          | (0.42, 1.37) | 0.946                    |
|                         | Non-white   | 89/191 (47%)                                                               | 96/184 (52%)        | 0.78                          | (0.52, 1.18) |                          |

\*adjusted for age, ICS at baseline (except ICS dose model) and RCT population; # from those controlled at baseline

Figure S1. Kaplan Meier curves showing time to loss of control for patients who were initially controlled and whose asthma treatment was guided by either fractional exhaled nitric oxide (“FENO”) or by symptoms only (“standard”) and stratified by atopy. The difference between treatment arms was significant for those who were atopic ( $p=0.050$ ) but not for the non-atopic patients ( $p=0.566$ ).

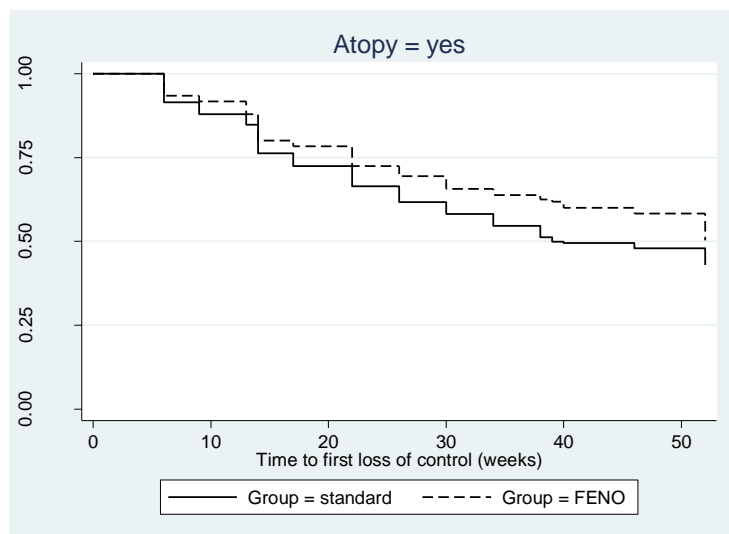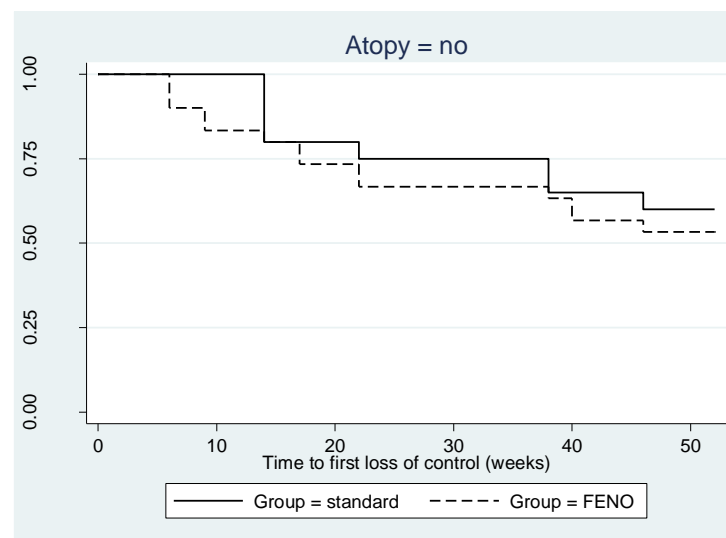

## REFERENCES

1. Fritsch M, Uxa S, Horak FJ, Putschoegl B, Dehlink E, Szepefalusi Z, Frischer T. Exhaled nitric oxide in the management of childhood asthma: a prospective 6-months study. *Pediatr Pulmonol* 2006; 41: 855-862.
2. Peirsman EJ, Carvelli TJ, Hage PY, Hanssens LS, Pattyn L, Raes MM, Sauer KA, Vermeulen F, Desager KN. Exhaled nitric oxide in childhood allergic asthma management: a randomised controlled trial. *Pediatr Pulmonol* 2014; 49: 624-631.
3. Petsky HL, Li AM, Au CT, Kynaston JA, Turner C, Chang AB. Management based on exhaled nitric oxide levels adjusted for atopy reduces asthma exacerbations in children: A dual centre randomized controlled trial. *Pediatr Pulmonol* 2015; 50: 535-543.
4. Pijnenburg MW, Bakker EM, Hop WC, De Jongste JC. Titrating steroids on exhaled nitric oxide in children with asthma: a randomized controlled trial. *American Journal of Respiratory & Critical Care Medicine* 2005; 172: 831-836.
5. Pike K, Selby A, Price S, Warner J, Connett G, Legg J, Lucas JSA, Peters S, Buckley H, Magier K, Foote K, Drew K, Morris R, Lancaster N, Roberts G. Exhaled nitric oxide monitoring does not reduce exacerbation frequency or inhaled corticosteroid dose in paediatric asthma: a randomised controlled trial. *The clinical respiratory journal* 2013; 7: 204-213.

6. Szeffler SJ, Mitchell H, Sorkness CA, Gergen PJ, O'Connor GT, Morgan WJ, Kattan M, Pongracic JA, Teach SJ, Bloomberg GR, Eggleston PA, Gruchalla RS, Kerckhove CM, Liu AH, Wildfire JJ, Curry MD, Busse WW. Management of asthma based on exhaled nitric oxide in addition to guideline-based treatment for inner-city adolescents and young adults: a randomised controlled trial. *Lancet* 2008; 372: 1065-1072.

7. Voorend-van Bergen S, Vaessen-Verberne AA, Brackel HJ, Landstra AM, van den Berg NJ, Hop WC, de Jongste JC, Merkus PJ, Pijnenburg MW. Monitoring strategies in children with asthma: a randomised controlled trial. *Thorax* 2015; 70: 543-550.
