# Supplementary material
Source: HighWire-hosted journal article supplement (https://erj.ersjournals.com/content/55/5/1901879)
Supplement: inline-supplementary-material-2 [file inline-supplementary-material-2.pdf]

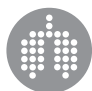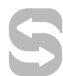

SHAREABLE PDF

# Does treatment guided by exhaled nitric oxide fraction improve outcomes in subgroups of children with asthma?

Shona S. Fielding<sup>1</sup>, Marielle Pijnenburg<sup>2</sup>, Johan de Jongste<sup>2</sup>, Katherine Pike<sup>3,4</sup>, Graham Roberts<sup>3</sup>, Helen Petsky<sup>5</sup>, Anne B. Chang<sup>6,7</sup>, Maria Fritsch<sup>8</sup>, Thomas Frischer<sup>8</sup>, Stanley J. Szeftler<sup>9</sup>, Peter Gergen<sup>10</sup>, Francoise Vermeulen<sup>11</sup>, Robin Vael<sup>12</sup> and Steve S. Turner<sup>13</sup> 

**Affiliations:** <sup>1</sup>Medical Statistics Team, Institute of Applied Health Sciences, University of Aberdeen, Aberdeen, UK. <sup>2</sup>Dept of Paediatric Respiratory Medicine and Allergology, Erasmus MC – Sophia Children's Hospital, Rotterdam, The Netherlands. <sup>3</sup>Clinical and Experimental Science Academic Unit, University of Southampton, Southampton, UK. <sup>4</sup>Respiratory Critical Care and Anaesthesia Group, Institute of Child Health, University College London, London, UK. <sup>5</sup>School of Nursing and Midwifery, Griffith University, Menzies Health Institute Queensland, Brisbane, Australia. <sup>6</sup>Dept of Respiratory and Sleep Medicine, Queensland Children's Hospital, Queensland University of Technology, Brisbane, Australia. <sup>7</sup>Child Health Division, Menzies School of Health Research, Charles Darwin University, Darwin, Australia. <sup>8</sup>University Children's Hospital, Vienna, Austria. <sup>9</sup>Breathing Institute, Children's Hospital Colorado, Dept of Pediatrics, University of Colorado School of Medicine, Aurora, CO, USA. <sup>10</sup>National Institute of Allergy and Infectious Diseases, Bethesda, MD, USA. <sup>11</sup>Pediatric Dept, Hôpital Erasme, Université Libre de Bruxelles (U.L.B.), Brussels, Belgium. <sup>12</sup>Dept of Paediatrics, Antwerp University Hospital, Antwerp, Belgium. <sup>13</sup>Child Health, University of Aberdeen, Aberdeen, UK.

**Correspondence:** Steve Turner, Child Health, Royal Aberdeen Children's Hospital, Aberdeen, AB25 2ZG, UK. E-mail: s.w.turner@abdn.ac.uk

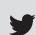

@ERSpublications

Some children with asthma may have better outcomes than others if their treatment is guided by exhaled nitric oxide <http://bit.ly/2VahxJV>

**Cite this article as:** Fielding SS, Pijnenburg M, de Jongste J, *et al.* Does treatment guided by exhaled nitric oxide fraction improve outcomes in subgroups of children with asthma? *Eur Respir J* 2020; 55: 1901879 [<https://doi.org/10.1183/13993003.01879-2019>].

This single-page version can be shared freely online.

## ABSTRACT

**Introduction:** Exhaled nitric oxide fraction ( $F_{ENO}$ ), a biomarker of eosinophilic airway inflammation, may be useful to guide asthma treatment.  $F_{ENO}$ -guided treatment may be more effective in certain subgroups for improving asthma outcomes compared to standard treatment.

**Methods:** An individual patient data analysis was performed using data from seven randomised clinical trials (RCTs) which used  $F_{ENO}$  to guide asthma treatment. The incidence of an asthma exacerbation and loss of control, and the time to first exacerbation and loss of control were described between five subgroups of RCT participants.

**Results:** Data were available in 1112 RCT participants. Among those not treated with leukotriene receptor antagonists (LTRA), but not among those who were treated with LTRA,  $F_{ENO}$ -guided treatment was associated with reduced exacerbation risk (OR 0.68, 95% CI 0.49–0.94), longer time to first exacerbation (hazard ratio (HR) 0.76, 95% CI 0.57–0.99) and borderline reduced risk for loss of control (OR 0.70, 95% CI 0.49–1.00). Nonobese children, compared to obese children, were less likely to lose asthma control when treatment was guided by  $F_{ENO}$  (OR 0.69, 95% CI 0.48–0.99) and time to loss of control was longer (HR 0.77, 95% CI 0.61–0.99).

**Conclusions:** Asthma treatment guided by  $F_{ENO}$  may be more effective in achieving better asthma outcomes for patients who are not treated with LTRA and who are not obese, compared to standard practice.
